# Supplementary material for: Repetitive fracturing during spine extrusion at Unzen volcano, Japan
Source: Copernicus journal article supplement (doi:10.5194/se-6-1277-2015), 2015-12-07
Supplement: Supplementary file 1 [file se-6-1277-2015-supplement.pdf]

Supplement of Solid Earth, 6, 1277–1293, 2015  
<http://www.solid-earth.net/6/1277/2015/>  
doi:10.5194/se-6-1277-2015-supplement  
© Author(s) 2015. CC Attribution 3.0 License.

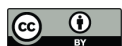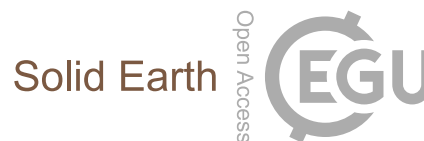

*Supplement of*

## **Repetitive fracturing during spine extrusion at Unzen volcano, Japan**

**O. D. Lamb et al.**

*Correspondence to:* O. D. Lamb (o.lamb@liv.ac.uk)

The copyright of individual parts of the supplement might differ from the CC-BY 3.0 licence.

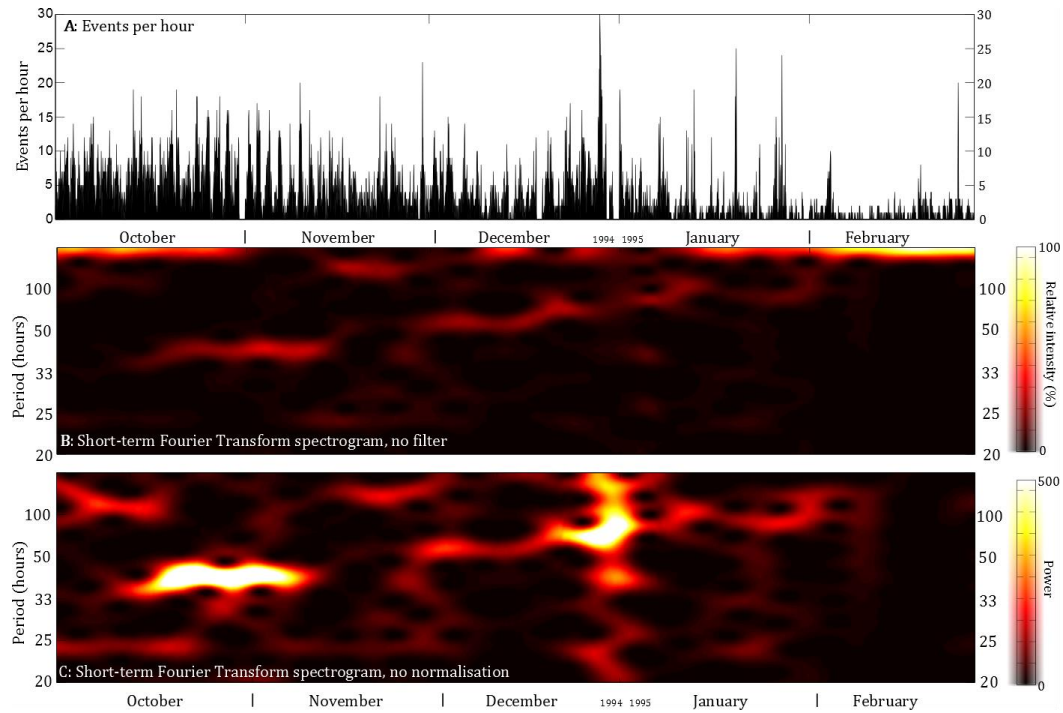

Supplementary Figure 1: (A) The hourly event record of events detected from continuous data recorded at station FG1 at Unzen from 1<sup>st</sup> October 1994 to 28<sup>th</sup> February 1995. (B) The STFT spectrogram for the hourly event count time-series plotted in (A), without any Butterworth filter applied to the time-series. (C) The STFT spectrogram of the hourly event count time-series plotted in (A), without any normalisation applied to each window.

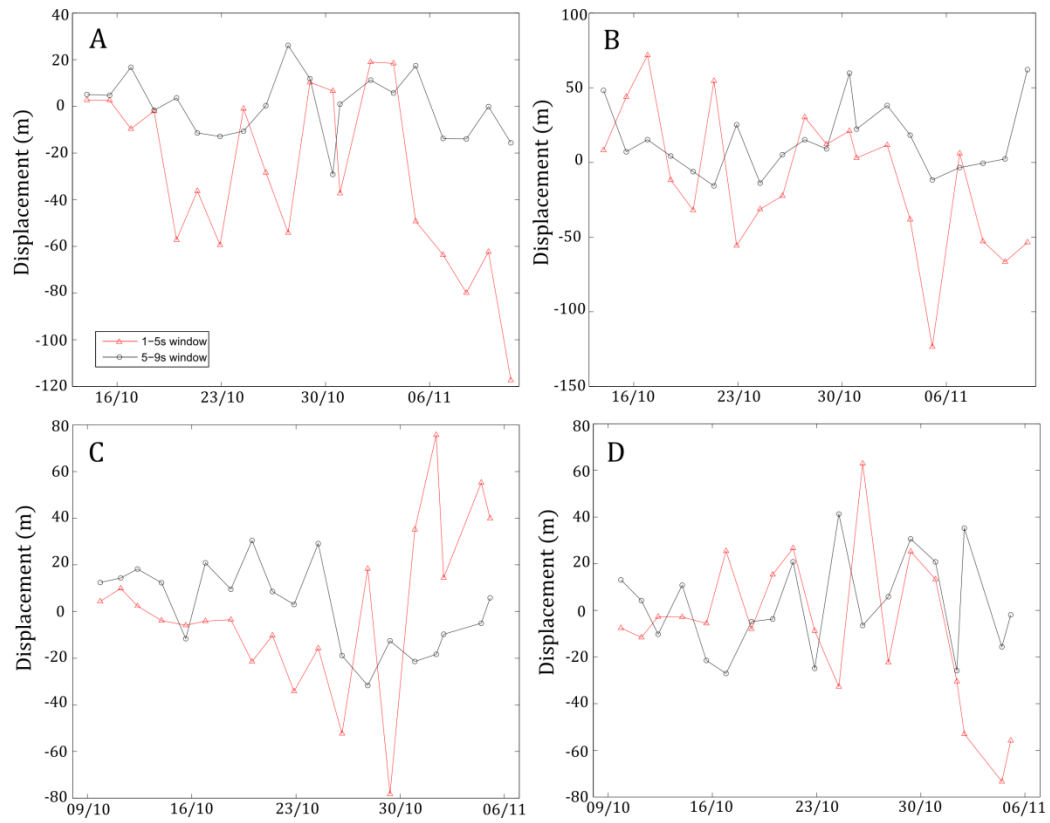

Supplementary Figure 2: Source displacements between the first stack and all other stacks for data bandpassed between 1-5 Hz (A and C) and 5-10 Hz (B and D) for cluster 1 (A and B) and cluster 2 (C and D).

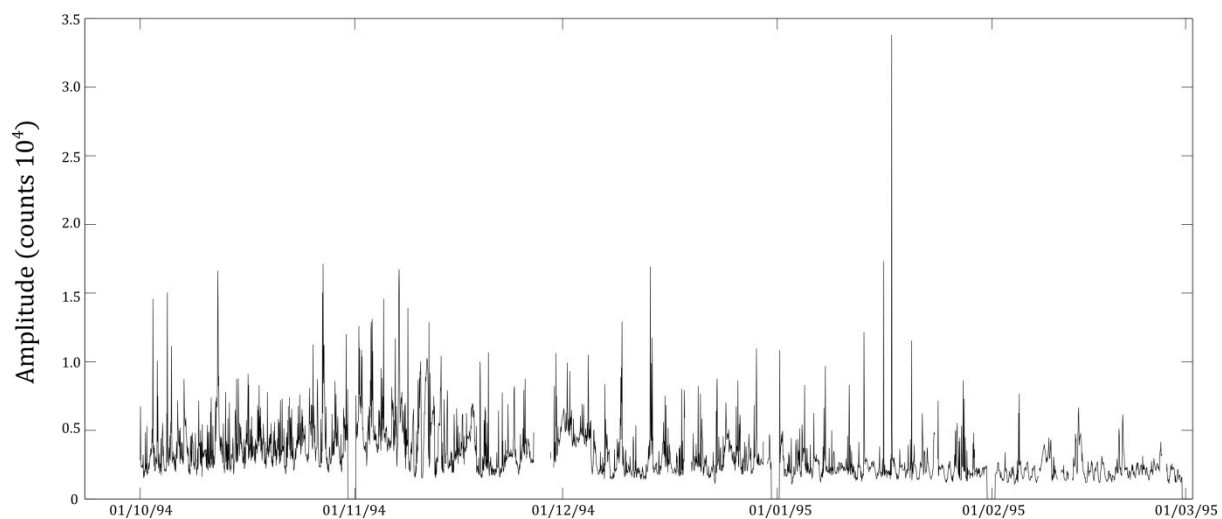

Supplementary Figure 3: 10-minute averaged Real-time Seismic Amplitude Measurements of the continuous data from station FG1.

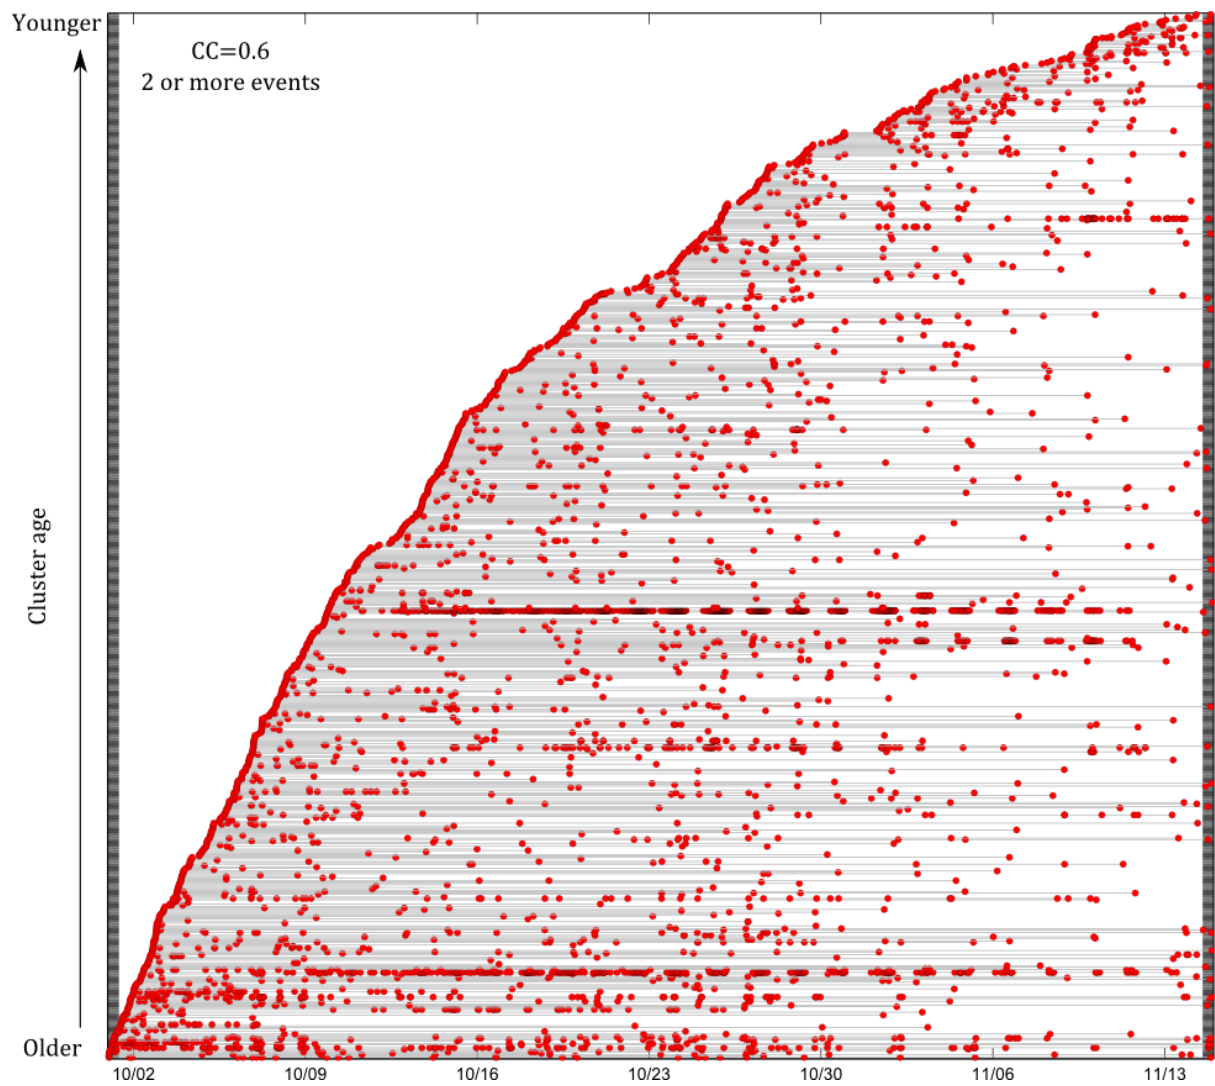

Supplementary Figure 4: Cluster lifespan plot for CC threshold of 0.6 and 2 or more events. Each line connects events within a single cluster. Clusters are plotted by age in ascending order.

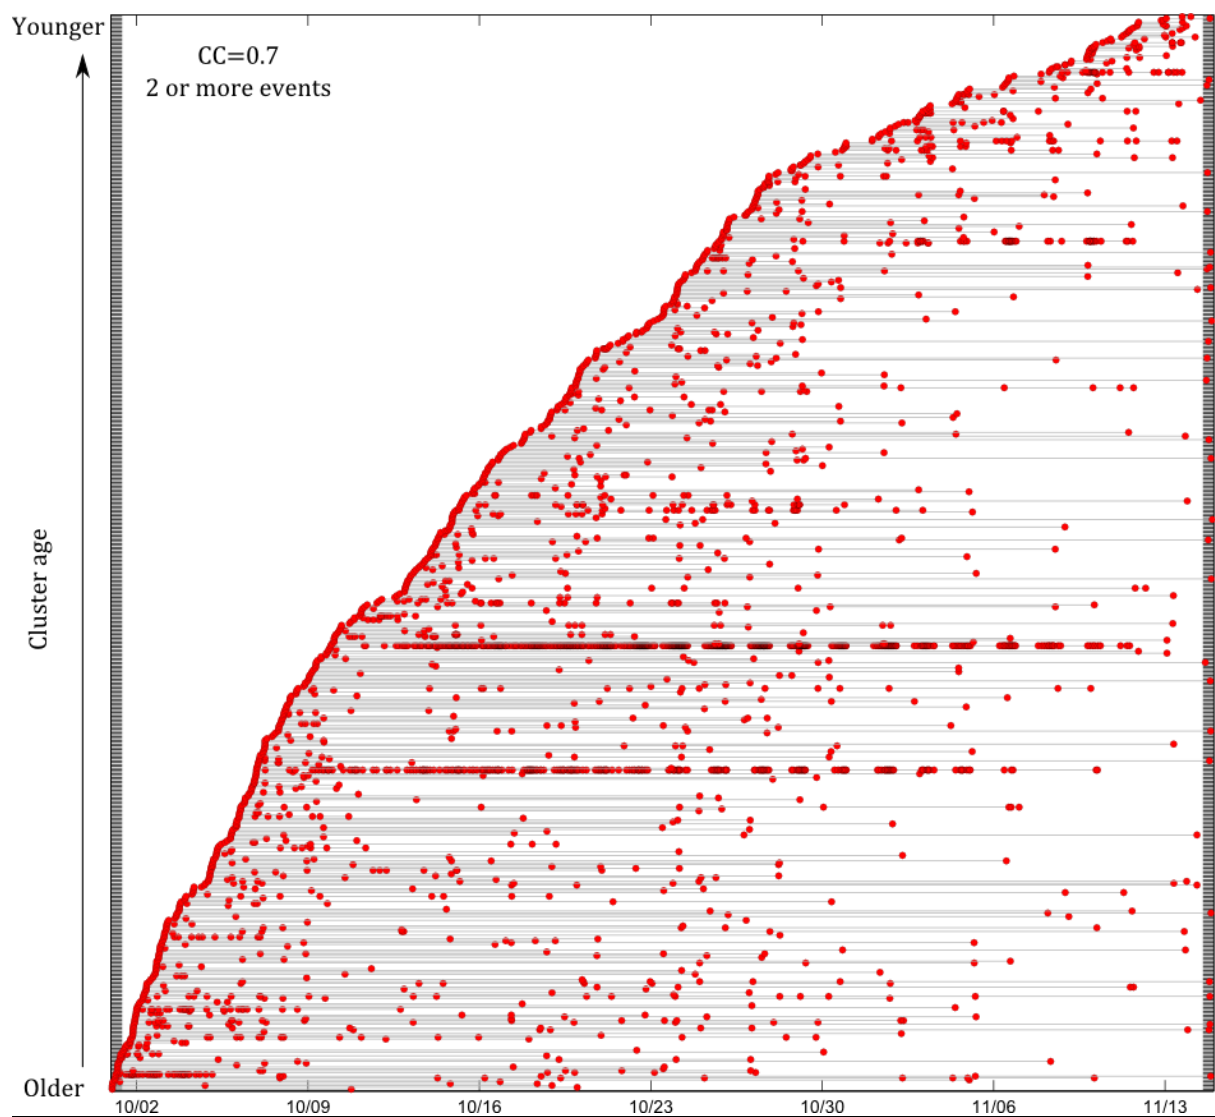

Supplementary Figure 5: Cluster lifespan plot for CC threshold of 0.7 and 2 or more events. Each line connects events within a single cluster. Clusters are plotted by age in ascending order.

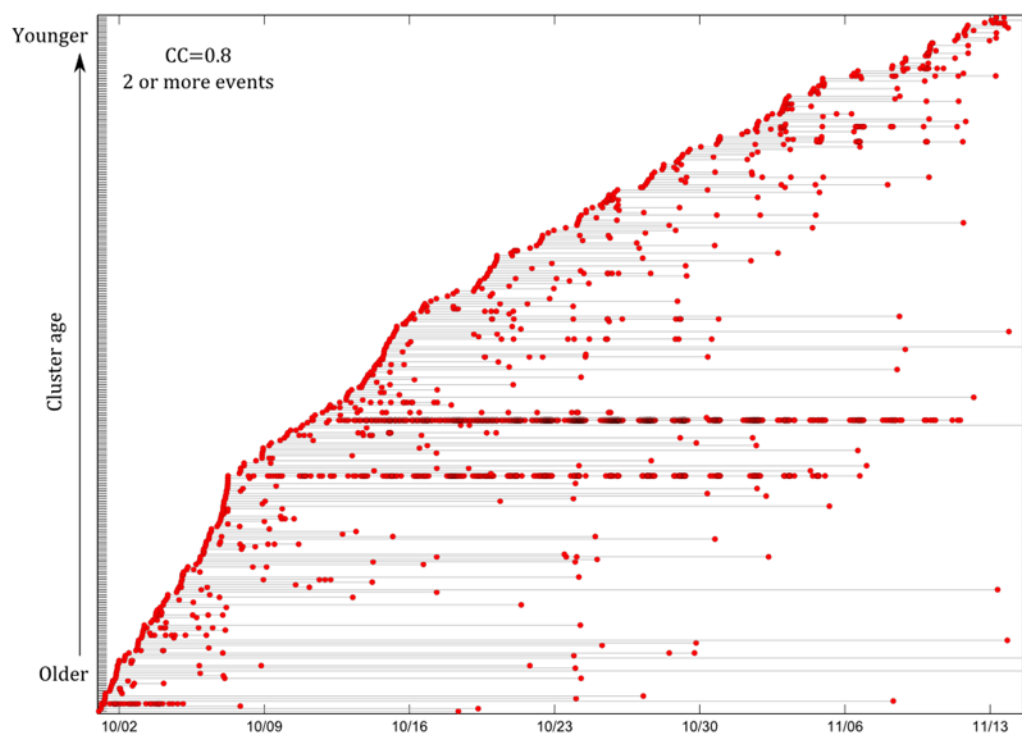

Supplementary Figure 6: Cluster lifespan plot for CC threshold of 0.8 and 2 or more events. Each line connects events within a single cluster. Clusters are plotted by age in ascending order.

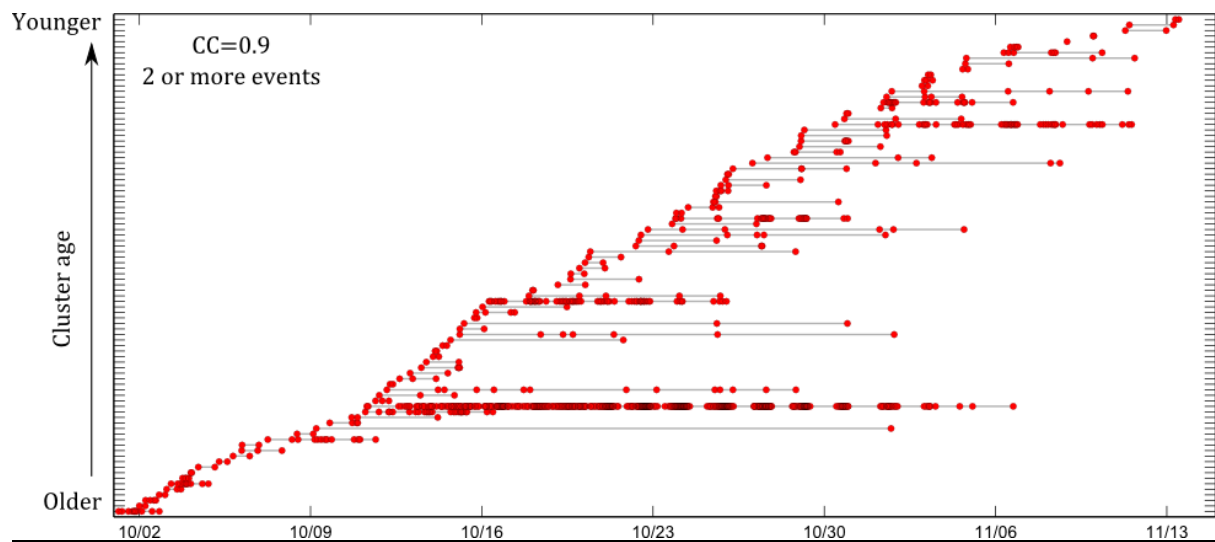

Supplementary Figure 7: Cluster lifespan plot for CC threshold of 0.9 and 2 or more events. Each line connects events within a single cluster. Clusters are plotted by age in ascending order.



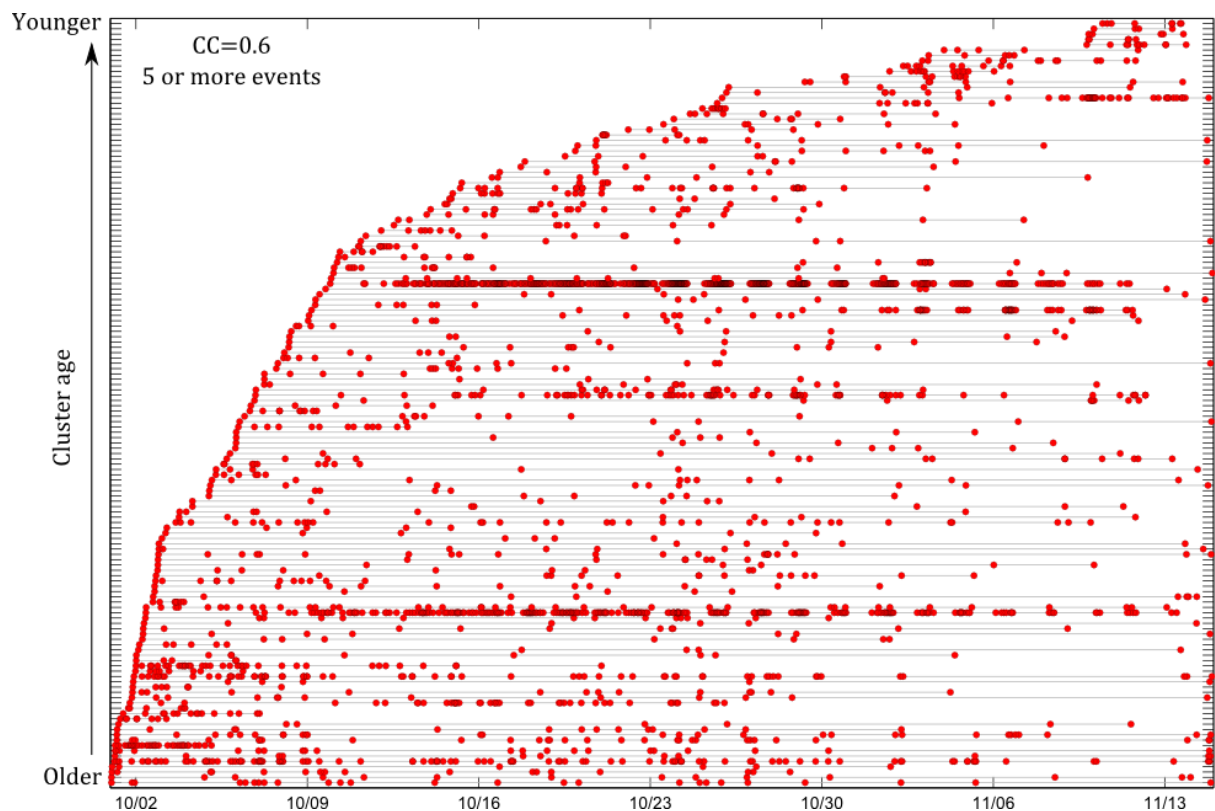

Supplementary Figure 8: Cluster lifespan plot for CC threshold of 0.6 and 5 or more events. Each line connects events within a single cluster. Clusters are plotted by age in ascending order.

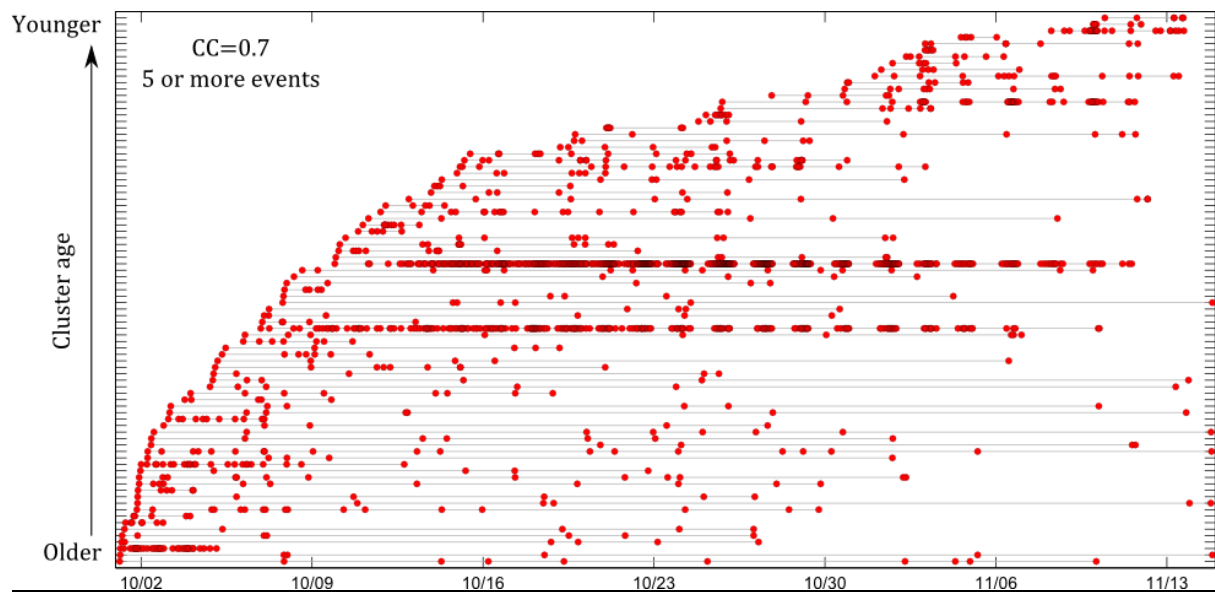

Supplementary Figure 9: Cluster lifespan plot for CC threshold of 0.7 and 5 or more events. Each line connects events within a single cluster. Clusters are plotted by age in ascending order.

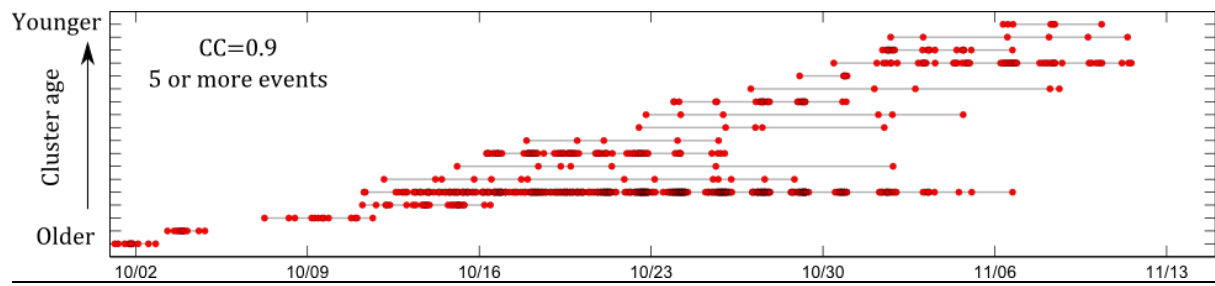

Supplementary Figure 10: Cluster lifespan plot for CC threshold of 0.9 and 5 or more events. Each line connects events within a single cluster. Clusters are plotted by age in ascending order.
